# Supplementary material
Source: bioRxiv or medRxiv preprint supplement (https://www.biorxiv.org/content/biorxiv/early/2019/01/29/533091.1/DC1/embed/media-1.pdf)
Supplement: Supplementary file [file media-1.pdf]

# Suppl. Figure S1

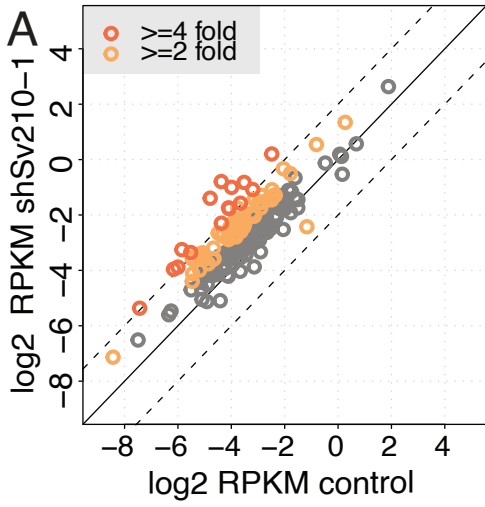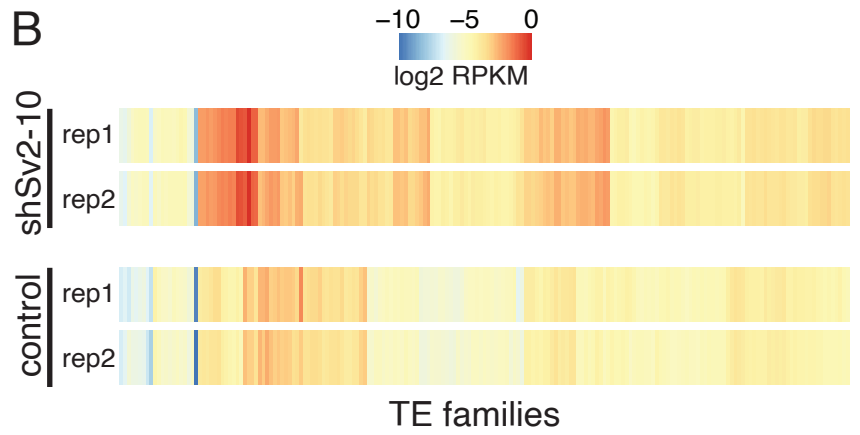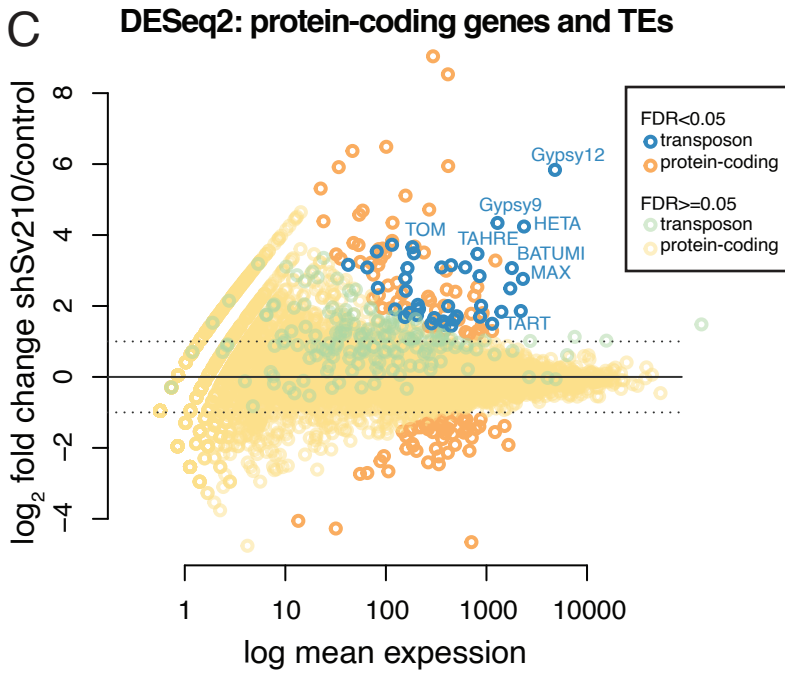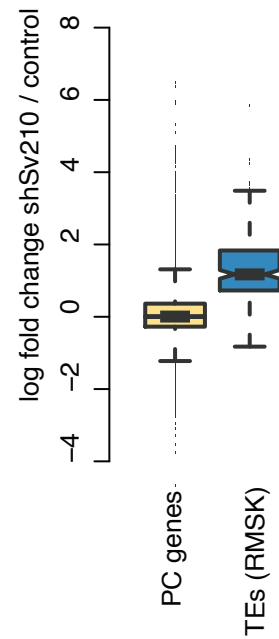

# Suppl. Figure S2

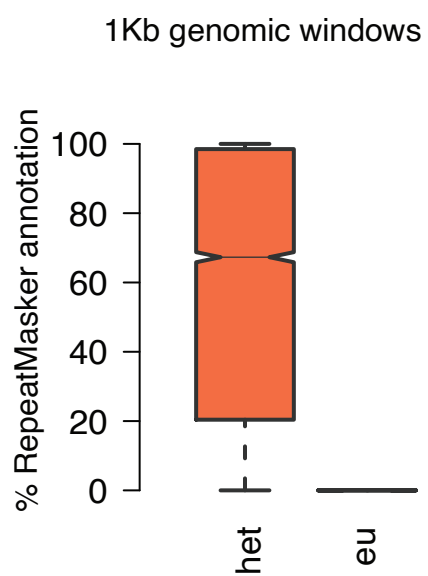

# Suppl. Figure S3

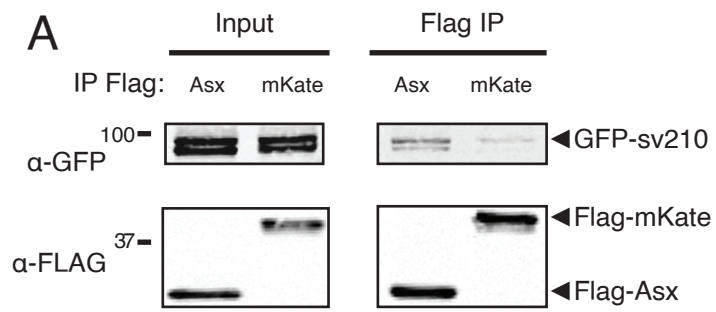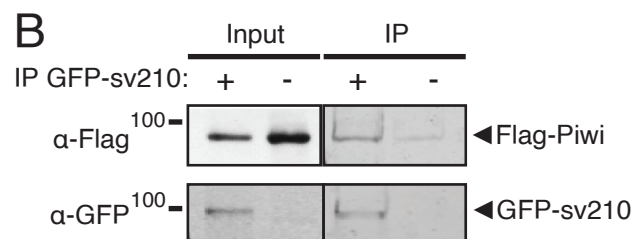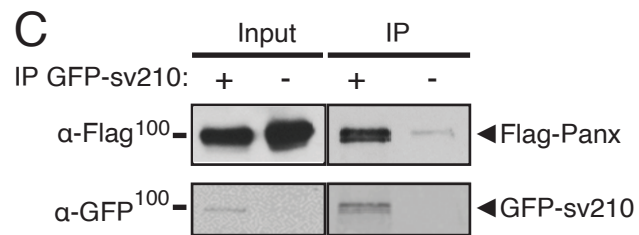

# Suppl. Figure S4

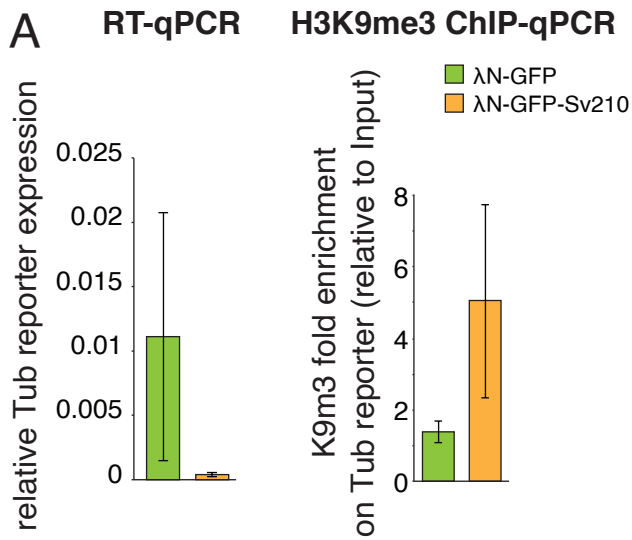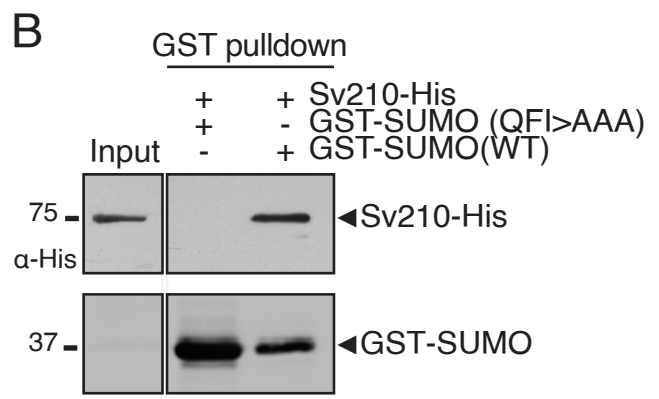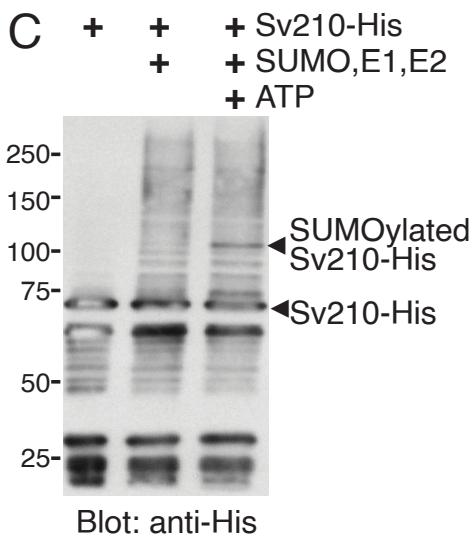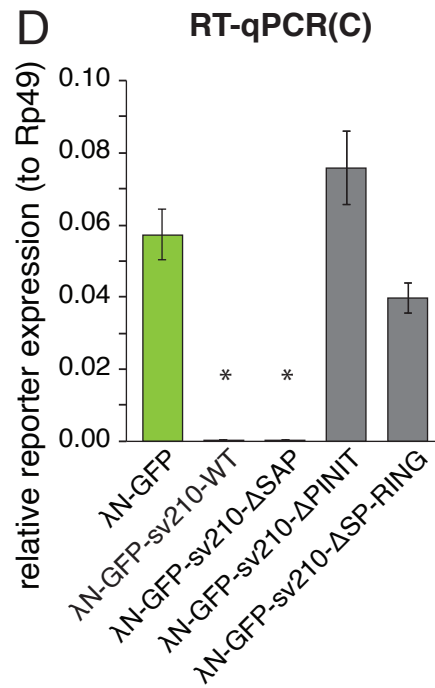

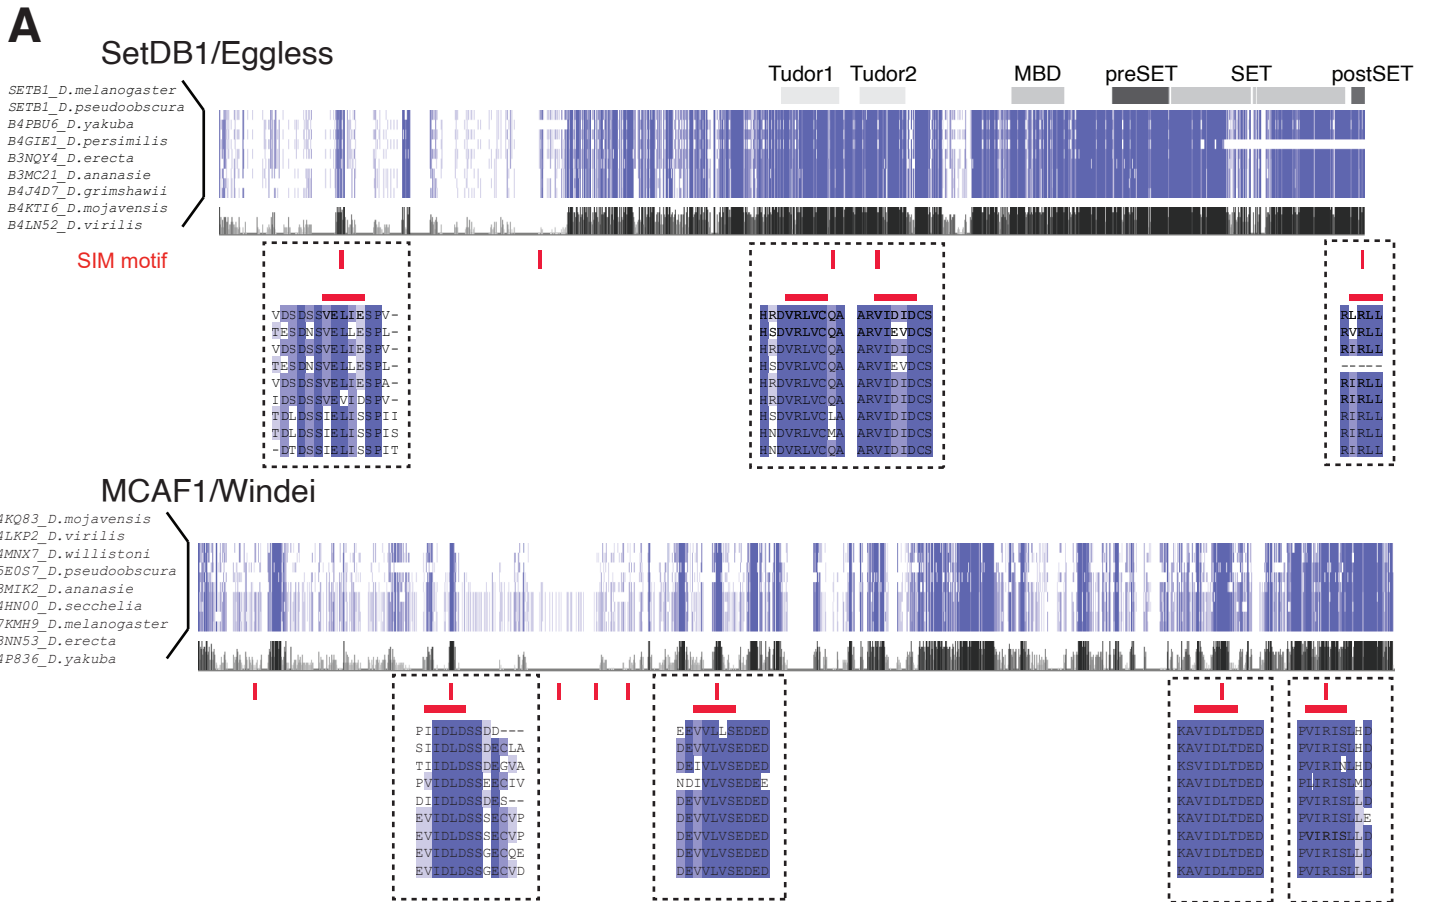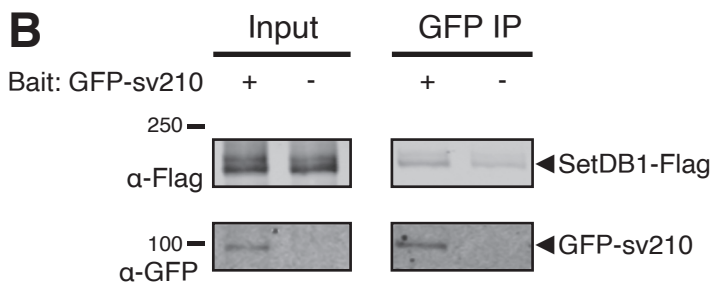

Supplementary Table S1. Primers list

| Name                | Sequence                                                                     |
|---------------------|------------------------------------------------------------------------------|
| Su(var)2-10-F       | CCAGCACAGGACGAACAGCCC                                                        |
| Su(var)2-10-R       | CGTGGAAGTGGCGACGGCTT                                                         |
| rp49-F              | CCGCTTCAAGGGACAGTATCTG                                                       |
| rp49-R              | ATCTCGCCGCAGTAAACGC                                                          |
| HetA-F              | CGCGCGGAACCCATCTTCAGA                                                        |
| HetA-R              | CGCCGCAGTCGTTTGGTGAGT                                                        |
| Blood-F             | TGCCACAGTACCTGATTTTCG                                                        |
| Blood-R             | GATTCGCCTTTTACGTTTGC                                                         |
| ZAM-F               | ACTTGACCTGGATACACTCACAAC                                                     |
| ZAM-R               | GAGTATTACGGCGACTAGGGATAC                                                     |
| Ptip 3'UTR-F        | CATGTGTGTTTCCGCCACAG                                                         |
| Ptip 3'UTR-R        | TTCCCAGCTCGCGAAGAAAT                                                         |
| CG32138-F           | CAGGATCTGCGCTACGACAT                                                         |
| CG32138-R           | AATCGTCGGTCCAGCTCATC                                                         |
| sh-Asterix-F        | CTAGCAGTCCAGTAGTTCGTGTTTCATCAATAGTTATATTCAAGCA<br>TATTGATGAACACGAACTACTGGGCG |
| sh-Asterix-R        | AATTCGCCCAGTAGTTCGTGTTTCATCAATATGCTTGAATATAACT<br>ATTGATGAACACGAACTACTGGACTG |
| mKate2-F(A)         | GTGACTGTGCGTTAGGTCCTG                                                        |
| mKate2-F(A)         | TGAAGTGGTGGTTGTTACGG                                                         |
| mKate2-F(B)         | TCAGAGGGGTGAACTTCCCA                                                         |
| mKate2-R(B)         | CTCCCAGCCGAGTGTTTTCT                                                         |
| mKate2-F(C)         | GGCCGACAAAGAGACCTACG                                                         |
| mKate2-R(C)         | CCAGTTTGCTAGGGAGGTCTG                                                        |
| Tub-BoxB reporter-F | CTTCCTCCTCATCCACAGCG                                                         |
| Tub-BoxB reporter-R | ACTTGTGGCCGTTTACGTCG                                                         |
